# Supplementary material
Source: PubMed Central journal article supplement (PMC4978159)
Supplement: BPH-173-2589-s001.pdf [file BPH-173-2589-s001.pdf]

**Table S1: Dose dependent effect of nitre rgic and  $\alpha_2$ -adrenoceptor ligands on inhibitory avoidance (IA) memory retrieval**

| <b>Drug</b> | <b>Doses</b>              | <b>Step through latency (s)</b> |
|-------------|---------------------------|---------------------------------|
| aCSF        | 0.5 $\mu$ l/LC            | 118.125 $\pm$ 2.43              |
| SNG         | 1.41 pg per rat, i-LC     | 128.0 $\pm$ 1.95                |
|             | 2.82 pg per rat, i-LC     | 132.4 $\pm$ 1.90                |
|             | 5.64 pg per rat, i-LC     | 205.5 $\pm$ 7.02*               |
|             |                           |                                 |
| aCSF        | 0.5 $\mu$ l/LC            | 121.25 $\pm$ 6.14               |
| L-NAME      | 26.9 pg per rat, i-LC     | 113 $\pm$ 4.58                  |
|             | 53.8 pg per rat, i-LC     | 96.2 $\pm$ 4                    |
|             | 107.6 pg per rat, i-LC    | 84.8 $\pm$ 3.90*                |
|             |                           |                                 |
| aCSF        | 0.5 $\mu$ l/LC            | 118.0 $\pm$ 5.22                |
| L-NIO       | 60 pg per rat, i-LC       | 107.3 $\pm$ 5.23                |
|             | 123 pg per rat, i-LC      | 88.5 $\pm$ 3.28                 |
|             | 246 pg per rat, i-LC      | 51.3 $\pm$ 3.10*                |
|             |                           |                                 |
| aCSF        | 0.5 $\mu$ l/LC            | 113.3 $\pm$ 7.2                 |
| L-NIL       | 208 pg per rat, i-LC      | 114.6 $\pm$ 3.85                |
|             | 416 pg per rat, i-LC      | 84.8 $\pm$ 2.13                 |
|             | 832 pg per rat, i-LC      | 73.3 $\pm$ 4.35*                |
|             |                           |                                 |
| aCSF        | 0.5 $\mu$ l/LC            | 121.8 $\pm$ 6.24                |
| 7-NI        | 10 ng per rat, i-LC       | 114.6 $\pm$ 2.13                |
|             | 20 ng per rat, i-LC       | 89.1 $\pm$ 2.83                 |
|             | 40 ng per rat, i-LC       | 76.0 $\pm$ 4.16*                |
|             |                           |                                 |
| aCSF        | 0.5 $\mu$ l/LC            | 110.5 $\pm$ 6.59                |
| Yohimbine   | 0.5 $\mu$ g per rat, i-LC | 149.7 $\pm$ 15.0                |
|             | 1 $\mu$ g per rat, i-LC   | 170.1 $\pm$ 2.30*               |
|             |                           |                                 |
| aCSF        | 0.5 $\mu$ l/LC            | 106.3 $\pm$ 5.29                |
| Clonidine   | 0.5 $\mu$ g per rat, i-LC | 33.5 $\pm$ 1.80*                |
|             | 1 $\mu$ g per rat, i-LC   | 28.0 $\pm$ 3.18*                |
|             |                           |                                 |

Table showing the dose dependant effects of the drugs, given alone, on the step-through latencies measured as described. Data shown are means  $\pm$  SEM of step through latency ( $n =$

8/group). Data were analyzed by one-way ANOVA followed by Dunnett's test. \* $P < 0.05$  Vs respective aCSF treatment.

**Figure S1:**

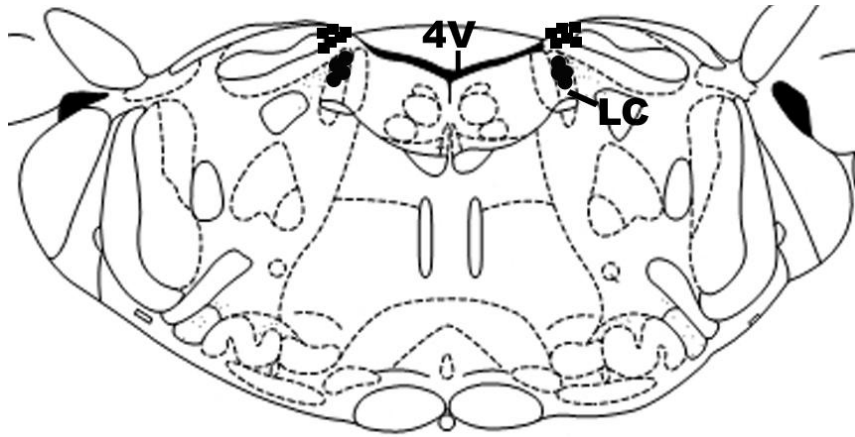

Figure S1: The schematic shows the representative site of injection in the locus coeruleus (LC; -9.8 mm to bregma). In the diagrammatic image, filled circles indicate the injection placement sites within LC. The squares represent injection sites outside the targeted area. 4V, fourth ventricle.
